# Supplementary material
Source: publisher figshare collection journal article supplement (https://frontiersin.figshare.com/ndownloader/files/12774806)
Supplement: Supplementary file [file 12774806]

# **Supplementary Materials for**

## **Integrated Serum and Fecal Metabolomics Study of**

### **Collagen-induced Arthritis rats and the Therapeutic Effects**

#### **of Zushima Tablet**

**Jinjun Shan<sup>1,2#</sup>, Linxiu Peng<sup>3#</sup>, Wenjuan Qian<sup>3</sup>, Tong Xie<sup>1,2</sup>, An Kang<sup>3,4</sup>, Bei Gao<sup>5</sup>,  
Liuqing Di<sup>1,3,4\*</sup>**

**\* Correspondence:** diliuqing928@163.com (Liuqing Di); jshan@njucm.edu.cn (Jinjun Shan)

#### **The PDF file includes:**

##### **Materials and Methods**

**Figure S1** EI-MS total ion chromatograph (TIC) of (A) serum and (B) fecal samples based on gas chromatography-mass spectrometry.

**Figure S2** PCA score plots of metabolic profiling of QC and experimental samples in (A) serum and (B) fecal samples.

**Table S1** The calibration curves, linear ranges, correlation coefficients (R<sup>2</sup>) of SCFAs

**Table S2** The *P* value of correlation analysis for perturbed gut bacteria families and altered serum metabolites in day 36.

**Table S3** The *P* value of correlation analysis for perturbed gut bacteria families and altered fecal metabolites in day 36.

**Table S4.** The *P* value of correlation analysis for perturbed gut bacteria families and short chain fatty acids in day 36.

##### **Materials and Methods**

##### **Chemicals and materials**

Daphnetin, daphnoretin, 7-hydroxycoumarin, luteoloside and kaempferol were all purchased from Sichuan Weikeyi Bio-tech Co., Ltd. (Chengdu, China). Apigenin was obtained from Chengdu Herbpurify Co., LTD (Chengdu, China). All herb standard compounds were determined by HPLC and their purities were all higher than 98%.

Acetate was purchased from ROE Scientific (St. Louis, MO, USA). Propionate was purchased from Dr.Ehrenstorfer GmbH (Augsburg, Germany). Butyrate,

isobutyrate, valerate and isovalerate were all obtained from Tokyo Chemical Industry Co., LTD (Tokyo, Japan). Pyridine and hexanoic acid-6,6,6-d<sub>3</sub> were obtained from Sigma-Aldrich (St. Louis, MO, USA). Propyl chloroformate and 1-propanol were purchased from J&K Scientific Co., LTD (Beijing, China).

#### **Quality evaluation of ZT assessed by UHPLC-Q Exactive-Orbitrap-MS**

ZT was removed with film coating and grinded. About 0.3 g ZT powder was weighed and placed into conical flask and 25 mL 85% methanol water solution was added in conical flask. The mixture was ultrasounded for 30min (the frequency was 50Hz, and the power was 500W). Eventually, the supernatant was obtained and injected into the UHPLC-Q Exactive-Orbitrap-MS.

The chromatographic separation was achieved based on Synchronis C18 column (100×2.1mm×1.7μm, Thermo). The injection volume used was 5μL. The column oven temperature was 40°C and the mobile phase consisted of 0.1% formic acid in water (Solvent A) and acetonitrile (Solvent B) with a linear gradient elution: 0–2 min, 10% B; 2–20 min, 10–60% B; 20–21 min, 60–90%B; 21–22 min, 90% B; 22–23 min, 90–10% B, and held for 5 min. The flow rate was 0.2 mL/min. The system was equipped with an ESI source, operated in negative ionization mode using the following parameters: capillary temperature was 300°C, sheath gas flow was 45 arbitrary units, auxiliary gas was 10 arbitrary units, source voltage was 3.5 kV. Data were collected from 100 m/z to 1000 m/z.

#### **Quantification of SCFAs in fecal samples**

100 mg fecal samples were spiked with 1 mL 0.005M NaOH solution and homogenized for 5 min, and the mixtures were centrifuged at 13,000 rpm for 10 min to obtain 0.6 mL supernatant. About 10 μL hexanoic acid-6,6,6-d<sub>3</sub> (internal standard, IS, 527μg/mL) were added in supernatant and the mixtures were vortexed for 5 min. Aliquots of 500 μL fecal samples with IS mixture were transferred into 10 mL glass centrifuge tubes, in addition, 300 μL water were added followed by 500 μL isopropanol/pyridine (3/2, v/v) and 100 μL propyl chloroformate for derivatization. The mixtures were vortexed and ultrasounded for 1 min, and then 300 μL n-hexane were added for extracting SCFAs. After vortexing for 1 min, the mixtures were centrifuged at 2,000 rpm for 10 min and 200 μL supernatant was transferred into a 1.5 mL eppendorf tube. In addition, another 200 μL n-hexane were added for the second

step extraction. 400  $\mu$ L supernatant in total were vortexed for injecting into GC-MS system for analysis.

The SCFAs were separated on TG-5MS capillary column (0.25 mm $\times$ 30 m $\times$ 0.25  $\mu$ m, Thermo Fisher, San Jose, CA, USA) with a split ratio of 20:1. The injection volume was 1  $\mu$ L. The gradient heating program was conducted as follows: 0–2 min, 50  $^{\circ}$ C; 2–4 min, 50–70  $^{\circ}$ C; 4–9 min, 70–85  $^{\circ}$ C; 9–14 min, 85–110  $^{\circ}$ C; 14–20 min, 110–290  $^{\circ}$ C; 20–28 min, 290  $^{\circ}$ C. Helium (99.999%) was used as the carrier gas, with a flow rate of 1.2 mL/min. TSQ 8000 was equipped with an Electron Ionization (EI) source. The ionization energy was 70 eV, the source temperature was 300  $^{\circ}$ C, and the transfer line was held at 300  $^{\circ}$ C. The GC-MS data were acquired after a solvent delay of 2.00 min, and the MS scan range was 30–600 m/z. The calibration curves were shown in **Table S1**.

**Table S1** The calibration curves, linear ranges, correlation coefficients ( $R^2$ ) of SCFAs

| SCFAs       | Calibration curves     | $R^2$  | Liner range ( $\mu$ g/mL) |
|-------------|------------------------|--------|---------------------------|
| Acetate     | $y = 0.0282x + 0.4725$ | 0.9992 | 19.92-637.43              |
| Propionate  | $y = 0.0144x + 0.5465$ | 0.9994 | 25.07-401.14              |
| Isobutyrate | $y = 0.1963x + 0.1500$ | 0.9995 | 1.60-51.25                |
| Butyrate    | $y = 0.1482x + 0.3926$ | 0.9991 | 3.13-200.43               |
| Isovalerate | $y = 0.1520x + 0.0962$ | 0.9987 | 1.49-47.75                |
| Valerate    | $y = 0.2437x + 0.0491$ | 0.9996 | 1.57-100.50               |

**Figure S1**

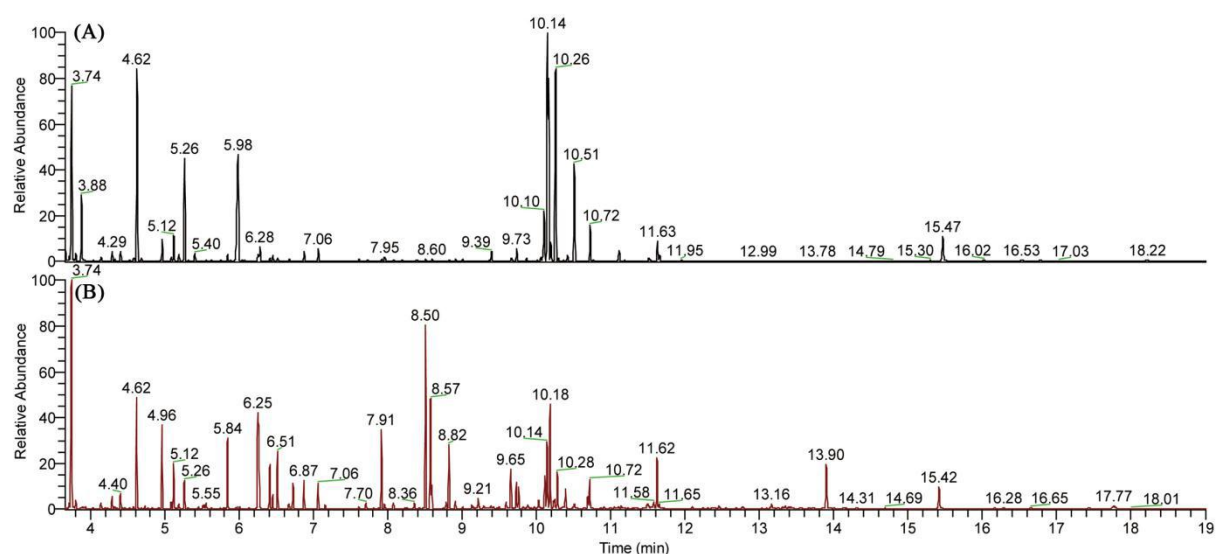

**Figure S1** EI-MS total ion chromatograph (TIC) of (A) serum and (B) fecal samples based on gas chromatography-mass spectrometry.

**Figure S2**

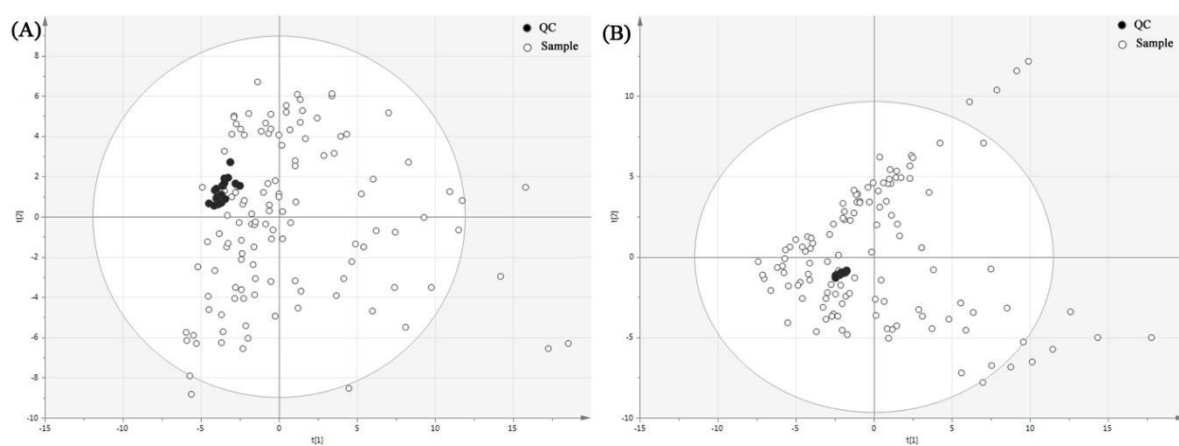

**Figure S2** PCA score plots of metabolic profiling of QC and experimental samples in (A) serum and (B) fecal samples.

**Table S2** The *P* value of correlation analysis for perturbed gut bacteria families and altered serum metabolites in day 36.

|                                   | Cholic acid | D-mannose | Palmitoleic acid | Spermidine | Threonic acid |
|-----------------------------------|-------------|-----------|------------------|------------|---------------|
| <i>Bifidobacteriaceae</i>         | 0.276       | 0.01      | 0.271            | 0.063      | 0.006         |
| <i>Coriobacteriaceae</i>          | 0.024       | 0.013     | 0.416            | 0.002      | 0.414         |
| <i>Corynebacteriaceae</i>         | 0.004       | 0.125     | 0.126            | 0.009      | 0.678         |
| <i>Bacteroidaceae</i>             | 0.001       | 0         | 0.088            | 0.032      | 0.663         |
| <i>Bacteroidales S24-7 group</i>  | 0.024       | 0.024     | 0.047            | 0.17       | 0.623         |
| <i>Porphyromonadaceae</i>         | 0.013       | 0.001     | 0.038            | 0.026      | 0.7           |
| <i>Gastranaerophilales_norank</i> | 0.001       | 0.026     | 0.045            | 0.02       | 0.252         |
| <i>Elusimicrobiaceae</i>          | 0.417       | 0.482     | 0.412            | 0.021      | 0.841         |
| <i>Clostridiaceae 1</i>           | 0.949       | 0.166     | 0.789            | 0.196      | 0.025         |
| <i>Deftuviitaleaceae</i>          | 0.01        | 0.891     | 0.003            | 0.003      | 0.143         |
| <i>Enterococcaceae</i>            | 0.025       | 0.05      | 0.009            | 0.006      | 0.91          |
| <i>Peptococcaceae</i>             | 0.1         | 0.387     | 0.083            | 0.399      | 0.199         |
| <i>Ruminococcaceae</i>            | 0.007       | 0.035     | 0.404            | 0          | 0.084         |
| <i>Staphylococcaceae</i>          | 0.003       | 0.073     | 0.011            | 0          | 0.195         |
| <i>Alcaligenaceae</i>             | 0.031       | 0.022     | 0.053            | 0.022      | 0.256         |
| <i>Burkholderiaceae</i>           | 0.982       | 0.44      | 0.757            | 0.021      | 0.156         |
| <i>Enterobacteriaceae</i>         | 0.004       | 0.163     | 0.009            | 0.001      | 0.685         |
| <i>Halomonadaceae</i>             | 0.644       | 0.007     | 0.061            | 0.054      | 0.036         |
| <i>Mollicutes RF9_norank</i>      | 0.003       | 0.103     | 0.346            | 0.005      | 0.316         |

**Table S3.** The *P* value of correlation analysis for perturbed gut bacteria families and altered fecal metabolites in day 36.

|                                   | Adenine | Ethanolamine | Ferulic acid | L-Glutamine | L-Isoleucine | L-Leucine | L-Phenylalanine | L-Serine | Thymine | L-Tyrosine |
|-----------------------------------|---------|--------------|--------------|-------------|--------------|-----------|-----------------|----------|---------|------------|
| <i>Bifidobacteriaceae</i>         | 0.035   | 0.106        | 0.047        | 0.101       | 0.143        | 0.389     | 0.153           | 0.041    | 0.929   | 0.041      |
| <i>Coriobacteriaceae</i>          | 0.507   | 0.087        | 0.024        | 0.434       | 0.323        | 0.329     | 0.445           | 0.664    | 0.161   | 0.329      |
| <i>Corynebacteriaceae</i>         | 0.201   | 0.087        | 0.785        | 0.654       | 0.643        | 0.992     | 0.633           | 0.43     | 0.047   | 0.814      |
| <i>Bacteroidaceae</i>             | 0.458   | 0.072        | 0.224        | 0.992       | 0.302        | 0.392     | 0.773           | 0.798    | 0.154   | 0.55       |
| <i>Bacteroidales S24-7 group</i>  | 0.276   | 0.086        | 0.412        | 0.855       | 0.278        | 0.352     | 0.635           | 0.943    | 0.33    | 0.528      |
| <i>Porphyromonadaceae</i>         | 0.513   | 0.04         | 0.094        | 0.809       | 0.132        | 0.201     | 0.467           | 0.693    | 0.222   | 0.233      |
| <i>Gastranaerophilales_norank</i> | 0.165   | 0.009        | 0.107        | 0.128       | 0.032        | 0.144     | 0.568           | 0.728    | 0.012   | 0.536      |
| <i>Elusimicrobiaceae</i>          | 0.642   | 0.014        | 0.018        | 0.71        | 0.912        | 0.582     | 0.93            | 0.588    | 0.814   | 0.542      |
| <i>Clostridiaceae 1</i>           | 0.607   | 0.649        | 0.016        | 0.261       | 0.728        | 0.938     | 0.791           | 0.233    | 0.896   | 0.9        |
| <i>Defluviitaleaceae</i>          | 0.072   | 0.08         | 0.526        | 0.138       | 0.007        | 0.02      | 0.044           | 0.344    | 0.057   | 0.099      |
| <i>Enterococcaceae</i>            | 0.44    | 0.029        | 0.15         | 0.609       | 0.179        | 0.109     | 0.169           | 0.425    | 0.536   | 0.133      |
| <i>Peptococcaceae</i>             | 0.005   | 0.365        | 0.929        | 0.274       | 0.175        | 0.488     | 0.773           | 0.858    | 0.062   | 0.687      |
| <i>Ruminococcaceae</i>            | 0.083   | 0.143        | 0.003        | 0.092       | 0.121        | 0.164     | 0.423           | 0.211    | 0.592   | 0.178      |
| <i>Staphylococcaceae</i>          | 0.022   | 0.004        | 0.341        | 0.988       | 0.405        | 0.777     | 0.948           | 0.993    | 0.046   | 0.674      |
| <i>Alcaligenaceae</i>             | 0.254   | 0.001        | 0.425        | 0.73        | 0.261        | 0.388     | 0.266           | 0.71     | 0.567   | 0.136      |
| <i>Burkholderiaceae</i>           | 0.121   | 0.373        | 0.035        | 0.26        | 0.414        | 0.711     | 0.8             | 0.494    | 0.496   | 0.555      |
| <i>Enterobacteriaceae</i>         | 0.218   | 0.026        | 0.244        | 0.712       | 0.121        | 0.219     | 0.566           | 0.704    | 0.207   | 0.413      |
| <i>Halomonadaceae</i>             | 0.182   | 0.158        | 0.003        | 0.03        | 0.031        | 0.124     | 0.232           | 0.055    | 0.167   | 0.15       |
| <i>Mollicutes RF9_norank</i>      | 0.262   | 0.094        | 0.074        | 0.58        | 0.295        | 0.394     | 0.826           | 0.625    | 0.565   | 0.53       |

**Table S4.** The *P* value of correlation analysis for perturbed gut bacteria families and short chain fatty acids in day 36.

|                                   | Acetate | Propionate | Butyrate | Isobutyrate | Valerate | Isovalerate |
|-----------------------------------|---------|------------|----------|-------------|----------|-------------|
| <i>Bifidobacteriaceae</i>         | 0       | 0.061      | 0.457    | 0.604       | 0.077    | 0.404       |
| <i>Coriobacteriaceae</i>          | 0.03    | 0.002      | 0.026    | 0.067       | 0.027    | 0.058       |
| <i>Corynebacteriaceae</i>         | 0.232   | 0.166      | 0.015    | 0.119       | 0.256    | 0.244       |
| <i>Bacteroidaceae</i>             | 0.078   | 0.016      | 0.069    | 0.228       | 0.08     | 0.192       |
| <i>Bacteroidales S24-7 group</i>  | 0.013   | 0.012      | 0.026    | 0.064       | 0.009    | 0.108       |
| <i>Porphyromonadaceae</i>         | 0.046   | 0.03       | 0.064    | 0.096       | 0.026    | 0.075       |
| <i>Gastranaerophilales_norank</i> | 0.014   | 0.046      | 0.282    | 0.941       | 0.47     | 0.707       |
| <i>Elusimicrobiaceae</i>          | 0.7     | 0.066      | 0.036    | 0.018       | 0.008    | 0.018       |
| <i>Clostridiaceae 1</i>           | 0.021   | 0.99       | 0.19     | 0.695       | 0.931    | 0.807       |
| <i>Defluviitaleaceae</i>          | 0.055   | 0.028      | 0.053    | 0.921       | 0.802    | 0.953       |
| <i>Enterococcaceae</i>            | 0.014   | 0.002      | 0.029    | 0.199       | 0.206    | 0.3         |
| <i>Peptococcaceae</i>             | 0.03    | 0.041      | 0.52     | 0.51        | 0.582    | 0.335       |
| <i>Ruminococcaceae</i>            | 0.109   | 0.032      | 0.105    | 0.36        | 0.176    | 0.368       |
| <i>Staphylococcaceae</i>          | 0.041   | 0.016      | 0.003    | 0.097       | 0.071    | 0.181       |
| <i>Alcaligenaceae</i>             | 0.044   | 0.002      | 0.12     | 0.697       | 0.279    | 0.629       |
| <i>Burkholderiaceae</i>           | 0.015   | 0.118      | 0.134    | 0.174       | 0.021    | 0.208       |
| <i>Enterobacteriaceae</i>         | 0.056   | 0.004      | 0.075    | 0.362       | 0.468    | 0.539       |
| <i>Halomonadaceae</i>             | 0       | 0.138      | 0.71     | 0.566       | 0.064    | 0.466       |
| <i>Mollicutes RF9_norank</i>      | 0.217   | 0.016      | 0.109    | 0.382       | 0.28     | 0.35        |
